# Supplementary material for: Reconciling the conservation of the purple swamphen (Porphyrio porphyrio) and its damage in Mediterranean rice fields through sustainable non-lethal techniques
Source: PeerJ. 2018 Apr 24;6:e4518. doi: 10.7717/peerj.4518 (PMC5922229; doi:10.7717/peerj.4518)
Supplement: Supplemental Information 2 [file peerj-06-4518-s002.xlsx]

## Sheet: Hoja1
SECTOR	PARCELA	TIPO	SUP (HA)	LONG (m) CONTACTO BORDE CON CARRIZAL	Nº LADOS CONTRA CARRIZAL	relación longitud contacto carrizal/sup	X	Y
BUDA	1	ACTUACIÓN	2.67	100	1	37.5	317933	4508392
	2	ACTUACIÓN	2.56	112	1	43.8	317840	4508194
	3	ACTUACIÓN	3.14	75	1	23.9	317660	4508036
	4	ACTUACIÓN	2.7	95	1	35.2	317603	4507880
	5	CONTROL	3.07	131	1	42.7	317542	4507668
BUDA	SUBTOTAL	ACTUACIÓN	11.07	382
		CONTROL	3.07	131
PLATJOLA	1	ACTUACIÓN	2.31	250	1	108.2	313305	4504960
	2	CONTROL	1.99	284	1	142.7	313399	4505092
	3	ACTUACIÓN	1.52	295	1	194.1	313065	4504384
	4	ACTUACIÓN	1.4	186	1	132.9	312984	4504173
	5	ACTUACIÓN	0.68	197	1	289.7	313163	4503651
PLATJOLA	SUBTOTAL	CONTROL	1.99	284
		ACTUACIÓN	5.91	928
ENCANYISSADA	1	ACTUACIÓN	5.02	122	1	24.3	301567	4503630
	2	ACTUACIÓN	5.56	143	1	25.7	301308	4503547
	3	ACTUACIÓN	4.19	126	1	30.1	301181	4503462
	4	ACTUACIÓN	5.19	153	1	29.5	300877	4503352
	5	CONTROL	4.3	136	1	31.6	300743	4503262
ENCANYISSADA	SUBTOTAL	ACTUACIÓN	19.96	544
		CONTROL	4.3	136
TOTAL		ACTUACIÓN	36.94	1854
		CONTROL	9.36	136
SECTOR	PARCELA	TIPO	SUP (HA)	LONG (m) CONTACTO BORDE CON CARRIZAL	Nº LADOS CONTRA CARRIZAL	relación longitud contacto carrizal/sup	X	Y		SECTOR	PARCELA	TIPO	SUP (HA)	LONG (m) CONTACTO BORDE CON CARRIZAL	Nº LADOS CONTRA CARRIZAL	relación longitud contacto carrizal/sup	X	Y
BUDA	1	CONTROL	3	131	1	43.7	317542	4507668		BUDA	1	ACTUACIÓN	2.5	94.5	1	37.1	317583	4507788
	3	ACTUACIÓN	2.7	95	1	35.2	317603	4507880			2	ACTUACIÓN	3.1	91	1	29.2	317612	4507877
	5	CONTROL	2.8	75	1	26.8	317660	4508036			3	ACTUACIÓN	3.1	92.2	1	30.2	317658	4508045
	7	ACTUACIÓN	2.5	112	1	44.8	317840	4508194			4	ACTUACIÓN	3.1	76	1	24.9	317643	4507957
	9	CONTROL	2.6	100	1	38.5	317933	4508392			5	ACTUACIÓN	2.7	113.2	1	42.3	317790	4508087
	11	ACTUACIÓN	2.5	56	1	22.4	317988	4508593			6	CONTROL	2.6	109.6	1	42.4	317844	4508194
BUDA	SUBTOTAL	ACTUACIÓN	7.7	263							7	CONTROL	2.6	109.1	1	41.3	317892	4508297
		CONTROL	8.4	306							8	CONTROL	2.8	101.6	1	36.7	317938	4508393
PLATJOLA	8	CONTROL	2.394	186	1	77.7	312968	4504198			9	CONTROL	2.9	103.4	1	36	317980	4508487
	11	CONTROL	1.395	190	2	136.2	313095	4504606			10	CONTROL	2.6	55.8	1	21.9	318006	4508581
	9	ACTUACIÓN	1.545	300	2	194.2	313041	4504408		BUDA	SUBTOTAL	ACTUACIÓN	14.4	466.9
	5	CONTROL	1.9	290	2	152.6	313127	4503677				CONTROL	13.4	479.5
	13	ACTUACIÓN	3.92	280	2	71.4	313367	4505112		MIGJORN	1	ACTUACIÓN	2.1	339.8	1	165.7	316054	4505464
	6	ACTUACIÓN	1.078	190	2	176.3	313154	4504027			2	ACTUACIÓN	3	0	0	0	316248	4505545
	12	CONTROL	0.69	186	1	269.6	313296	4504895			3	ACTUACIÓN	3	0	0	0	316451	4505630
PLATJOLA	SUBTOTAL	CONTROL	6.379	852							4	ACTUACIÓN	3	0	0	0	316649	4505713
		ACTUACIÓN	6.543	770							5	CONTROL	1.5	196.5	1	131	317236	4505962
ENCANYISSADA	5	CONTROL	5.5	143	1	26	301308	4503547			6	CONTROL	1.4	195.5	1	136.7	317207	4506033
	7	ACTUACION	4.8	122	1	25.4	301567	4503630			7	CONTROL	1.5	206.1	1	137.4	317173	4506116
	4	ACTUACION	4.35	133	1	30.6	301140	4503486			8	CONTROL	1.4	199.6	1	139.6	317138	4506197
	2	CONTROL	5.5	159	1	28.9	300854	4503378		MIGJORN	SUBTOTAL	ACTUACIÓN	11	339.8
ENCANYISSADA	SUBTOTAL	ACTUACIÓN	9.15	255								CONTROL	5.9	797.6
		CONTROL	11	302						TOTAL		ACTUACIÓN	25.5	806.7
TOTAL		ACTUACIÓN	23.393	1288								CONTROL	19.3	1277.1
		CONTROL	25.779	1460

## Sheet: daños y medidas disuasorias
Area	Year	Plot identity	Area (ha)	Length of border of plot in contact with reedbed (in m)	Type of plot	% area damaged (july)	log (10)+1 % area damaged (july)	% area damaged (august)	log(10)+ 1 % area damaged (august)	% area damaged (september)	log(10)+1 % area damaged (september)	change rate of % area damaged (july-august)	change rate of % area damaged (august-september)	change rate of % area damaged (july-septemb)	surface damaged (ha) sprouting	log (10)+1 surface damaged (ha) sprouting	surface damaged (ha) growing	log(10)+1 surface damaged (ha) growing	surface damaged (ha) maturation	log(10)+1 surface damaged (ha) maturation
Buda	2013	1	2.67	100	treatment	2.31333	1.36424	0.493744	0.693501	0.359193	0.555328	-1.8	-0.1	-1.9	0.0617659	-0.209251	0.013183	-0.879987	0.00959046	-1.01816
Buda	2013	2	2.56	112	treatment	3.26091	1.51334	0.215158	0.332757	0.291363	0.464434	-3.1	0.1	-3	0.0834794	-0.0784207	0.00550804	-1.259	0.00745889	-1.12733
Buda	2013	3	3.14	75	treatment	7.2936	1.86294	0.49397	0.693701	0.230483	0.362639	-6.8	-0.3	-7.1	0.229019	0.359872	0.0155107	-0.809369	0.00723717	-1.14043
Buda	2013	4	2.7	95	treatment	9.35052	1.97084	0.440991	0.644429	0.275629	0.440324	-9	-0.1	-9.1	0.252464	0.4022	0.0119067	-0.924207	0.00744197	-1.12831
Buda	2013	5	3.07	131	control	23.3414	2.36813	15.1234	2.17965	10.6268	2.0264	-12.1	-4.5	-16.6	0.716582	0.855266	0.464289	0.666788	0.326244	0.513543
Encanyissada	2013	1	5.02	122	treatment	7.18039	1.85615	2.31422	1.3644	2.38454	1.3774	-4.9	0.1	-4.8	0.360456	0.556852	0.116174	0.0651082	0.119704	0.0781085
Encanyissada	2013	2	5.56	143	treatment	9.41454	1.9738	4.54777	1.6578	3.59923	1.55621	-4.9	-0.9	-5.8	0.523448	0.718874	0.252856	0.402873	0.200117	0.301284
Encanyissada	2013	3	4.19	126	treatment	5.30372	1.72458	0.690643	0.839253	0.72068	0.857742	-4.6	0	-4.6	0.222226	0.346795	0.0289379	-0.538533	0.0301965	-0.520044
Encanyissada	2013	4	5.19	153	treatment	6.51502	1.81392	2.3879	1.37802	0.692633	0.840503	-4.1	-1.7	-5.8	0.338129	0.529083	0.123932	0.0931834	0.0359476	-0.44433
Encanyissada	2013	5	4.3	136	control	4.94871	1.69449	6.17057	1.79033	4.24538	1.62792	1.3	-2	-0.7	0.212794	0.32796	0.265335	0.423794	0.182552	0.261385
Platjola	2013	1	2.31	250	treatment	55.9131	2.74751	57.8559	2.76235	56.2715	2.75029	2	-1.6	0.4	1.29159	1.11113	1.33647	1.12596	1.29987	1.1139
Platjola	2013	2	1.99	284	control	44.9508	2.65274	58.4006	2.76642	73.9083	2.86869	13.4	15.5	28.9	0.89452	0.95159	1.16217	1.06527	1.47077	1.16755
Platjola	2013	3	1.52	295	treatment	10.2045	2.00879	11.7488	2.06999	10.8718	2.0363	1.5	-0.8	0.7	0.155108	0.190634	0.178582	0.251837	0.165251	0.218144
Platjola	2013	4	1.4	186	treatment	12.0349	2.08044	3.85854	1.58642	5.20809	1.71668	-8.1	1.3	-6.8	0.168489	0.226571	0.0540195	-0.267449	0.0729132	-0.137194
Platjola	2013	5	0.68	197	treatment	34.0092	2.5316	18.8137	2.27448	28.2969	2.45174	-15.2	9.5	-5.7	0.231263	0.364105	0.127933	0.106984	0.192419	0.284247
Buda	2014	1	3	131	control	17.78	2.24993	3.5	1.54407	6.83	1.83442	-14.28	3.33	-10.95	0.44638	0.649705	0.10588	0.0248139	0.18883	0.276071
Buda	2014	3	2.7	95	treatment	29.15	2.46464	9.95	1.99782	9.38	1.9722	-19.2	-0.57	-19.77	0.72109	0.857989	0.19281	0.28513	0.20687	0.315698
Buda	2014	5	2.8	75	control	18.4	2.26482	8.97	1.95279	10.81	2.03383	-9.43	1.84	-7.59	0.41218	0.615087	0.1545	0.188928	0.25296	0.403052
Buda	2014	7	2.5	112	treatment	22.97	2.36116	7.27	1.86153	5.59	1.74741	-15.7	-1.68	-17.38	0.58868	0.769879	0.15428	0.18831	0.11438	0.0583501
Buda	2014	9	2.6	100	control	27.9	2.4456	10.67	2.02816	15.67	2.19507	-17.23	5	-12.23	0.61194	0.786709	0.20492	0.311584	0.32099	0.506492
Buda	2014	11	2.5	56	treatment	27.7	2.44248	8.86	1.94743	9.72	1.98767	-18.84	0.86	-17.98	0.70248	0.846634	0.15079	0.178373	0.18975	0.278182
Platjola	2014	11	1.395	190	control	17.04	2.23147	4.54	1.65706	5.47	1.73799	-12.5	0.93	-11.57	0.19565	0.29148	0.04383	-0.358229	0.06669	-0.175939
Platjola	2014	9	1.545	300	treatment	8.51	1.92993	5	1.69897	2.99	1.47567	-3.51	-2.01	-5.52	0.11504	0.0608489	0.06357	-0.196748	0.03548	-0.450016
Platjola	2014	5	1.9	290	control	46.99	2.67201	19.78	2.29623	22.73	2.3566	-27.21	2.95	-24.26	0.957444	0.981113	0.34547	0.53841	0.40039	0.602483
Platjola	2014	13	3.92	280	treatment	100	3	67.95	2.83219	54.42	2.73576	-32.05	-13.53	-45.58	1.41186	1.14979	0.93993	0.973096	0.70948	0.85094
Platjola	2014	6	1.078	190	treatment	37.44	2.57334	3.47	1.54033	3.21	1.50651	-33.97	-0.26	-34.23	0.44781	0.651094	0.04127	-0.384366	0.04108	-0.38637
Platjola	2014	12	0.69	186	control	91	2.95904	67	2.82607	53.5	2.72835	-24	-13.5	-37.5		#NUM!		#NUM!		#NUM!
Encanyissada	2014	5	5.5	143	control		#NUM!		#NUM!	6.39	1.8055				5.79073	1.76273	5.79073	1.76273	0.33329	0.522822
Encanyissada	2014	7	4.8	122	treatment		#NUM!		#NUM!	8.91	1.94988				1.92596	1.28465	1.92596	1.28465	0.32561	0.512698
Encanyissada	2014	4	4.35	133	treatment		#NUM!		#NUM!	11.17	2.04805				4.35943	1.63943	4.35943	1.63943	0.41533	0.618393
Encanyissada	2014	2	5.5	159	control		#NUM!		#NUM!	26.2	2.4183				5.55144	1.74441	5.55144	1.74441	1.24779	1.09614
Buda	2015	1	2.5479	94.51	treatment	0.101793	0.00771718	1.70637	1.23207	0.435347	0.638835	1.60458	-1.27103	0.333554	0.002555	-1.59261	0.04283	-0.368252	0.0109272	-0.961491
Buda	2015	2	3.12065	91.03	treatment	0.0634686	-0.197441	1.26321	1.10147	0.345129	0.537982	1.19974	-0.918077	0.281661	0.00172	-1.76447	0.0342329	-0.465556	0.009353	-1.02905
Buda	2015	3	3.0512	92.17	treatment	0.0726087	-0.139011	1.92952	1.28545	0.352391	0.547025	1.85691	-1.57712	0.279783	0.002004	-1.6981	0.0532546	-0.273643	0.009726	-1.01207
Buda	2015	4	3.05	75.98	treatment	0.289802	0.462101	1.48548	1.17187	2.18426	1.3393	1.19568	0.698779	1.89446	0.008781	-1.05646	0.04501	-0.346691	0.066183	-0.179254
Buda	2015	5	2.67583	113.23	treatment	0.0695816	-0.157506	0.994895	0.997777	0.588368	0.769649	0.925314	-0.406527	0.518787	0.001663	-1.77911	0.023778	-0.623825	0.014062	-0.851953
Buda	2015	6	2.58826	109.62	control	0.0247082	-0.607159	1.72106	1.2358	0.56786	0.754241	1.69635	-1.1532	0.543152	0.000635	-2.19723	0.0442312	-0.354271	0.014594	-0.835826
Buda	2015	7	2.64025	109.09	control	0.0512595	-0.290225	2.86916	1.45775	0.511336	0.708706	2.8179	-2.35782	0.460076	0.001343	-1.87192	0.075172	-0.123944	0.013397	-0.872992
Buda	2015	8	2.76469	101.6	control	3.36721	1.52727	3.15564	1.49909	0.133421	0.125224	-0.211575	-3.02222	-3.23379	0.0895679	-0.0478476	0.08394	-0.076031	0.003549	-1.44989
Buda	2015	9	2.87017	103.377	control	1.27619	1.10592	1.44899	1.16107	0.641588	0.807257	0.172801	-0.807404	-0.634603	0.0353505	-0.451604	0.0401371	-0.396454	0.017772	-0.750264
Buda	2015	10	2.55	55.81	control	0.523974	0.71931	0.334675	0.524624	0.464274	0.666774	-0.189299	0.129598	-0.0597009	0.012261	-0.911474	0.0078314	-1.10616	0.010864	-0.96401
Migjorn	2015	1	2.05	339.78	treatment	0.51505	0.711849	0.1458	0.163758	0.6488	0.812111	-0.36925	0.503	0.13375	0.010301	-0.987121	0.002916	-1.53521	0.012976	-0.886859
Migjorn	2015	2	3	0	treatment	0.265552	0.424149	0.0686622	-0.163282	0.0658528	-0.181425	-0.19689	-0.00280936	-0.199699	0.00794	-1.10018	0.002053	-1.68761	0.001969	-1.70575
Migjorn	2015	3	3	0	treatment	1.15673	1.06323	0.096633	-0.0148746	0.155892	0.192825	-1.0601	0.0592593	-1.00084	0.034355	-0.46401	0.00287	-1.54212	0.00463	-1.33442
Migjorn	2015	4	2.99	0	treatment	0.841897	0.925259	0.047931	-0.319383	0.0874828	-0.0580775	-0.793966	0.0395517	-0.754414	0.024415	-0.612343	0.00139	-1.85699	0.002537	-1.59568
Migjorn	2015	5	1.5	196.48	control	1.49034	1.17329	0.652534	0.814603	1.10699	1.04414	-0.837808	0.454452	-0.383356	0.021759	-0.662361	0.009527	-1.02104	0.016162	-0.791505
Migjorn	2015	6	1.43	195.5	control	1.15336	1.06196	1.421	1.15259	1.5019	1.17664	0.267643	0.0809	0.348543	0.226147	0.354391	0.019894	-0.701278	0.0210266	-0.677231
Migjorn	2015	7	1.5	206.07	control	1.85785	1.26901	1.19906	1.07884	2.05677	1.31318	-0.658792	0.857705	0.198913	0.266082	0.425015	0.017866	-0.747973	0.0306458	-0.513629
Migjorn	2015	8	1.43	199.59	control	9.85036	1.99345	4.03686	1.60604	1.13606	1.0554	-5.8135	-2.9008	-8.7143	0.137905	0.13958	0.056516	-0.247829	0.0159048	-0.798472
