# Supplementary material for: Reconciling the conservation of the purple swamphen (Porphyrio porphyrio) and its damage in Mediterranean rice fields through sustainable non-lethal techniques
Source: PeerJ. 2018 Apr 24;6:e4518. doi: 10.7717/peerj.4518 (PMC5922229; doi:10.7717/peerj.4518)
Supplement: Supplemental Information 3 [file peerj-06-4518-s003.xlsx]

## Sheet: centroids 
	Centroids before and after deterrence to purple swamphens
	Centroids G								Centroids I
	OBJECTID	FolderPath	MOMENTO	ORIG_FID	x	y			OBJECTID	FolderPath	MOMENTO	ORIG_FID	x	y
	1	tag4590/Points	ANTES	0	312059	4.50361e+06			1	tag4590/Points	BEFORE	0	312290	4.50373e+06
	2	tag4590/Points	DESPUES	1	312068	4.50358e+06			2	tag4590/Points	AFTER	1	312140	4.50353e+06
	3	tag4592/Points	ANTES	2	312116	4.50354e+06			3	tag4592/Points	BEFORE	2	312281	4.50339e+06
	4	tag4592/Points	DESPUES	3	312371	4.50344e+06			4	tag4592/Points	AFTER	3	311614	4.50377e+06
	5	tag4593/Points	ANTES	4	311493	4.50353e+06			5	tag4593/Points	BEFORE	4	311477	4.50365e+06
	6	tag4593/Points	DESPUES	5	311486	4.50353e+06			6	tag4593/Points	AFTER	5	311856	4.50355e+06
	7	tag4594/Points	ANTES	6	312173	4.50355e+06			7	tag4594/Points	BEFORE	6	317122	4.50736e+06
	8	tag4594/Points	DESPUES	7	312123	4.50356e+06			8	tag4594/Points	AFTER	7	313089	4.50315e+06
	9	tag4595/Points	ANTES	8	311882	4.50357e+06			9	tag4595/Points	BEFORE	8	316888	4.50756e+06
	10	tag4595/Points	DESPUES	9	311804	4.50351e+06			10	tag4595/Points	AFTER	9	311857	4.50353e+06
	11	tag4596/Points	ANTES	10	311918	4.50361e+06			11	tag4596/Points	BEFORE	10	316896	4.50752e+06
	12	tag4596/Points	DESPUES	11	311772	4.50349e+06			12	tag4596/Points	AFTER	11	311803	4.50346e+06
	13	tag4597/Points	ANTES	12	318510	4.50909e+06			13	tag4597/Points	BEFORE	12	314726	4.51497e+06
	14	tag4597/Points	DESPUES	13	318510	4.50909e+06			14	tag4597/Points	AFTER	13	314726	4.51497e+06
	15	tag4598/Points	ANTES	14	311308	4.50388e+06			15	tag4598/Points	BEFORE	14	310404	4.50443e+06
	16	tag4598/Points	DESPUES	15	311656	4.50379e+06			16	tag4598/Points	AFTER	15	311775	4.50377e+06
	Centroid_G				Centroide _I
	Transmitter	Distance A-D (in m)	Direction		Transmitter	Distance A-D (in m)	Direction
	4590	22.12	SE		4590	245.79	SW			A = Before
	4592	278.49	SE		4592	767.6	NW			D= After
	4593	7.84	NW		4593	390.61	SE			Centroid G = centroids within the centre of the group of locations
	4594	50.52	NW		4594	5832.74	SW			Centroid I = centroids within a location of the group of locations
	4595	98.35	SW		4595	6408.75	SW
	4596	189.61	SW		4596	6521.97	SW
	4597	-	-		4597	-	-
	4598	362.14	SE		4598	1514.42	SE
	Location of centroids of each individual					Distances between centroids (m) of transmitters
	OBJECTID_1	x	y	Transmitter			4589	4590	4591	4592	4593	4594	4595	4596	4597	4598
	1	319167	4.50929e+06	4589		4589		9073.15	9380.53	9019.87	9591.54	9103.79	9343.47	9348.49	681.91	9501.77
	2	312066	4.50359e+06	4590		4590	9073.15		458.38	230.37	578.67	74	264.83	282.77	8473.38	748.52
	3	311629	4.50373e+06	4591		4591	9380.53	458.38		459.2	242.36	529.028	277.17	283.64	8745.1	291.21
	4	312266	4.50348e+06	4592		4592	9019.87	230.37	459.2		777.55	157.01	264.83	470	8388.3	974.98
	5	311490	4.50353e+06	4593		4593	9591.54	578.67	242.36	777.55		639.38	307.37	470.09	8982.54	341.51
	6	312129	4.50356e+06	4594		4594	9103.79	74.003	529.028	157.01	639.38		319.81	336.829	8445.45	819.55
	7	311812	4.50351e+06	4595		4595	9343.47	264.83	277.17	453.73	307.37	319.81		16.45	8724.81	550.54
	8	311796	4.50351e+06	4596		4596	9348.49	282.77	283.64	470.09	322.544	336.829	16.45		8709.98	560.33
	9	318510	4.50909e+06	4597		4597	681.91	8388.3	8745.1	8388.3	8982.54	8445.45	8724.8	8709.98		8874.91
	10	311363	4.50385e+06	4598		4598	9501.77	748.52	291.21	974.98	341.51	819.55	550.54	560.33	8874.9

## Sheet: kernel x transmitter  
	Kernel per transmitter
	4589	No se ha podido calcular el kernel.	no data
	4590	ISOPLETH	PERCENT	transmitter	Shape_Leng	área (m2)	x	y
		4294.52	95	4590	2908.85	673230	312066	4.50359e+06
		7384.87	90	4590	2659.52	562801	312067	4.50359e+06
		23198.5	50	4590	1633.86	212406	312067	4.50359e+06
	4591	ISOPLETH	PERCENT	transmitter	Shape_Leng	área (m2)	x	y
		4190.53	95	4591	2873.98	653129	311624	4.50374e+06
		6966.57	90	4591	2635.38	552620	311624	4.50373e+06
		20828.5	50	4591	1627.8	210831	311624	4.50373e+06
	4592	ISOPLETH	PERCENT	transmitter	Shape_Leng	área (m2)	x	y
		1.92369	95	4592	3283.38	1.56444e+06	310858	4.50344e+06
		1.92433	90	4592	3312.45	283967	311062	4.50344e+06
		1.92595	50	4592	4443.48	242646	312259	4.50348e+06
	4593	ISOPLETH	PERCENT	transmitter	Shape_Leng	área (m2)	x	y
		1815.83	95	4593	2841.95	642674	311488	4.50353e+06
		2924.51	90	4593	2613.52	543528	311488	4.50353e+06
		8693.06	50	4593	1616.22	207849	311488	4.50353e+06
	4594	ISOPLETH	PERCENT	transmitter	Shape_Leng	área (m2)	x	y
		4722.73	95	4594	3244.97	829135	312127	4.50355e+06
		10763	90	4594	2861.06	650456	312142	4.50355e+06
		43311.3	50	4594	1703.93	230887	312147	4.50355e+06
	4595	ISOPLETH	PERCENT	transmitter	Shape_Leng	área (m2)	x	y
		2773.14	95	4595	2879.4	659570	311806	4.50351e+06
		4605.56	90	4595	2641.08	555040	311806	4.50351e+06
		14114.7	50	4595	1626.58	210520	311805	4.50351e+06
	4596	ISOPLETH	PERCENT	transmitter	Shape_Leng	área (m2)	x	y
		1274.81	95	4596	2477.61	402904	311907	4.50349e+06
		2087.09	90	4596	2270.62	341386	311890	4.50349e+06
		6114.6	50	4596	1375.99	133596	311819	4.50349e+06
	4597	ISOPLETH	PERCENT	transmitter	Shape_Leng	área (m2)	x	y
		656.476	95	4597	3072.42	717425	318536	4.50913e+06
		2012.99	90	4597	2693.07	563770	318558	4.50913e+06
		7165.92	50	4597	1633.12	212217	318578	4.50913e+06
	4598	ISOPLETH	PERCENT	transmitter	Shape_Leng	área (m2)	x	y
		283.472	95	4598	4950.36	1.65591e+06	311437	4.5038e+06
		464.019	90	4598	4031.24	1.27057e+06	311338	4.50384e+06
		2572.44	50	4598	2204.96	385806	311303	4.50389e+06

## Sheet: kernel x month
	Kernel por meses
	4589
	Julio	FID	Shape	Id	ISOPLETH	ÁREA (m2)	PERCENT	x	y
		0	Polygon	0	1510.22	62636.7	95	319019	4.50917e+06
		1	Polygon	0	4010.21	31527.4	90	319019	4.50914e+06
		2	Polygon	0	161965	2613.85	50	319258	4.50936e+06
	4590
	July	FID	Shape	Id	ISOPLETH	ÁREA (m2)	PERCENT	x	y
		0	Polygon	0	2159.44	652928	95	312056	4.5036e+06
		1	Polygon	0	3552.62	550372	90	312056	4.5036e+06
		2	Polygon	0	10780	209644	50	312056	4.5036e+06
	August	FID	Shape	Id	ISOPLETH	ÁREA (m2)	PERCENT	x	y
		0	Polygon	0	2691.84	645283	95	312076	4.50358e+06
		1	Polygon	0	4272.14	548004	90	312076	4.50358e+06
		2	Polygon	0	12609	209761	50	312076	4.50358e+06
	4591
	July	FID	Shape	Id	ISOPLETH	ÁREA (m2)	PERCENT	x	y
		0	Polygon	0	1390.1	802160	95	311615	4.50375e+06
		1	Polygon	0	2231.85	685109	90	311615	4.50374e+06
		2	Polygon	0	6046.53	271300	50	311616	4.50373e+06
	August	FID	Shape	Id	ISOPLETH	ÁREA (m2)	PERCENT	x	y
		0	Polygon	0	2612.93	473189	95	311759	4.50385e+06
		1	Polygon	0	4109.63	454035	90	311717	4.50381e+06
		2	Polygon	0	9978.96	258043	50	311628	4.50373e+06
	September	FID	Shape	Id	ISOPLETH	ÁREA (m2)	PERCENT	x	y
		0	Polygon	0	8830.64	2670.56	95	311722	4.50375e+06
		1	Polygon	0	13649.2	2162.69	90	311723	4.50375e+06
		2	Polygon	0	51840.5	454.123	50	311732	4.50375e+06
	4592
	July	FID	Shape	Id	ISOPLETH	ÁREA (m2)	PERCENT	x	y
		0	Polygon	0	858.651	802607	95	312168	4.50352e+06
		1	Polygon	0	1596.01	649915	90	312157	4.50352e+06
		2	Polygon	0	5859.04	232855	50	312159	4.50352e+06
	August	FID	Shape	Id	ISOPLETH	ÁREA (m2)	PERCENT	x	y
		0	Polygon	0	7860.4	22663	95	312376	4.50345e+06
		1	Polygon	0	23942.6	12161.3	90	312383	4.50344e+06
		2	Polygon	0	385159	2027.23	50	312404	4.50342e+06
	September	FID	Shape	Id	ISOPLETH	ÁREA (m2)	PERCENT	x	y
		0	Polygon	0	161.619	3069.23	95	312379	4.50344e+06
		1	Polygon	0	162.193	1207.13	90	312385	4.50343e+06
		2	Polygon	0	165.36	265.162	50	312420	4.5034e+06
	4593
	July	FID	Shape	Id	ISOPLETH	ÁREA (m2)	PERCENT	x	y
		0	Polygon	0	1289.94	594343	95	311490	4.50355e+06
		1	Polygon	0	2025.76	509847	90	311489	4.50354e+06
		2	Polygon	0	5446.86	202086	50	311489	4.50353e+06
	August	FID	Shape	Id	ISOPLETH	ÁREA (m2)	PERCENT	x	y
		0	Polygon	0	95285.2	2448.03	95	311488	4.50353e+06
		1	Polygon	0	167820	1782.74	90	311487	4.50353e+06
		2	Polygon	0	1.16894e+06	343.802	50	311484	4.50353e+06
	September	FID	Shape	Id	ISOPLETH	ÁREA (m2)	PERCENT	x	y
		0	Polygon	0	59.6423	289335	95	311658	4.50344e+06
		1	Polygon	0	92.6586	278702	90	311622	4.50347e+06
		2	Polygon	0	225.867	165338	50	311503	4.50353e+06
	4594
	July	FID	Shape	Id	ISOPLETH	ÁREA (m2)	PERCENT	x	y
		0	Polygon	0	1235.21	677961	95	312149	4.50354e+06
		1	Polygon	0	2162.36	564830	90	312149	4.50354e+06
		2	Polygon	0	6839.47	212880	50	312149	4.50354e+06
	August	FID	Shape	Id	ISOPLETH	ÁREA (m2)	PERCENT	x	y
		0	Polygon	0	2563.39	679922	95	312140	4.50354e+06
		1	Polygon	0	4462.38	566968	90	312141	4.50354e+06
		2	Polygon	0	14188.9	212845	50	312141	4.50354e+06
	September	FID	Shape	Id	ISOPLETH	ÁREA (m2)	PERCENT	x	y
		0	Polygon	0	3004.22	669205	95	312171	4.50352e+06
		1	Polygon	0	4979.09	563051	90	312171	4.50352e+06
		2	Polygon	0	15278.3	213609	50	312171	4.50352e+06
	October	FID	Shape	Id	ISOPLETH	ÁREA (m2)	PERCENT	x	y
		0	Polygon	0	18687.7	11968.9	95	312149	4.5036e+06
		1	Polygon	0	52503.4	6357.08	90	312159	4.50359e+06
		2	Polygon	0	925780	898.769	50	312162	4.50361e+06
	Noviembre	FID	Shape	Id	ISOPLETH	ÁREA (m2)	PERCENT	x	y
		0	Polygon	0	4105.82	21962.7	95	312022	4.50362e+06
		1	Polygon	0	8118.27	15752.9	90	312035	4.50362e+06
		2	Polygon	0	60127.4	3137.57	50	312153	4.50359e+06
	Diciembre	FID	Shape	Id	ISOPLETH	ÁREA (m2)	PERCENT	x	y
		0	Polygon	0	2324.98	39279.8	95	311752	4.50372e+06
		1	Polygon	0	4646.99	28243.7	90	311743	4.50373e+06
		2	Polygon	0	32856.8	5742.8	50	311680	4.50375e+06
	Enero	FID	Shape	Id	ISOPLETH	ÁREA (m2)	PERCENT	x	y
		0	Polygon	0	4185.02	21893.9	95	21893.9	21893.9
		1	Polygon	0	7483.7	15576.6	90	15576.6	15576.6
		2	Polygon	0	77864.9	2839.71	50	2839.71
	Febrero	FID	Shape	Id	ISOPLETH	ÁREA (m2)	PERCENT	x	y
		0	Polygon	0	707.173	8141.11	95	311750	4.50368e+06
		1	Polygon	0	1175.42	6720.72	90	311749	4.50368e+06
		2	Polygon	0	5147.29	3081.9	50	311711	4.50371e+06
	4595
	July	FID	Shape	Id	ISOPLETH	ÁREA (m2)	PERCENT	x	y
		0	Polygon	0	843.319	643357	95	311805	4.50351e+06
		1	Polygon	0	1338.12	544760	90	311805	4.50351e+06
		2	Polygon	0	3939.99	208821	50	311805	4.50351e+06
	August	FID	Shape	Id	ISOPLETH	ÁREA (m2)	PERCENT	x	y
		0	Polygon	0	58343.5	5891.27	95	311804	4.50351e+06
		1	Polygon	0	139127	4241.67	90	311808	4.50351e+06
		2	Polygon	0	1.79361e+06	632.17	50	311808	4.5035e+06
	September	FID	Shape	Id	ISOPLETH	ÁREA (m2)	PERCENT	x	y
		0	Polygon	0	3004.22	669205	95	312171	4.50352e+06
		1	Polygon	0	4979.09	563051	90	312171	4.50352e+06
		2	Polygon	0	15278.3	213609	50	312171	4.50352e+06
	4596
	July	FID	Shape	Id	ISOPLETH	ÁREA (m2)	PERCENT	x	y
		0	Polygon	0	10119.1	9216.87	95	311766	4.50349e+06
		1	Polygon	0	50293.9	5974.95	90	311769	4.50349e+06
		2	Polygon	0	296079	708.963	50	311780	4.50352e+06
	August	FID	Shape	Id	ISOPLETH	ÁREA (m2)	PERCENT	x	y
		0	Polygon	0	28376.4	3327.49	95	311769	4.50349e+06
		1	Polygon	0	55269.8	2370.86	90	311769	4.50349e+06
		2	Polygon	0	500793	397.451	50	311772	4.5035e+06
	September	FID	Shape	Id	ISOPLETH	ÁREA (m2)	PERCENT	x	y
		0	Polygon	0	944605	187.019	95	311771	4.50348e+06
		1	Polygon	0	1.41252e+06	139.201	90	311771	4.50348e+06
		2	Polygon	0	1.21012e+07	22.7842	50	311771	4.50348e+06
	4597
	July	FID	Shape	Id	ISOPLETH	ÁREA (m2)	PERCENT	x	y
		0	Polygon	0	147.889	1.11116e+06	95	318421	4.50889e+06
		1	Polygon	0	273.831	819039	90	318483	4.50901e+06
		2	Polygon	0	1935.75	237505	50	318578	4.50914e+06
	August	FID	Shape	Id	ISOPLETH	ÁREA (m2)	PERCENT	x	y
		0	Polygon	0	5242.98	11908	95	318655	4.50908e+06
		1	Polygon	0	5292.76	8209.81	90	318620	4.50911e+06
		2	Polygon	0	5541.8	992.726	50	318589	4.50914e+06
	September	FID	Shape	Id	ISOPLETH	ÁREA (m2)	PERCENT	x	y
		0	Polygon	0	1646.03	13854.6	95	318576	4.50899e+06
		1	Polygon	0	1669.48	2775.28	90	318577	4.50901e+06
		2	Polygon	0	1740.71	2331.7	50	318569	4.50909e+06
	October	FID	Shape	Id	ISOPLETH	ÁREA (m2)	PERCENT	x	y
		0	Polygon	0	2102.65	21240.5	95	318578	4.50909e+06
		1	Polygon	0	3879.06	17386.6	90	318576	4.50909e+06
		2	Polygon	0	15464.9	4861.97	50	318580	4.50905e+06
	4598
	July	FID	Shape	Id	ISOPLETH	ÁREA (m2)	PERCENT	x	y
		0	Polygon	0	329.316	1.40964e+06	95	311463	4.50378e+06
		1	Polygon	0	496.032	1.06867e+06	90	311334	4.50383e+06
		2	Polygon	0	3158.35	310308	50	311299	4.5039e+06

## Sheet: Kernel x deterrence  
	kernel per disturbance
	4590
	Before	FID	Shape	Id	ISOPLETH	ÁREA (m2)	PERCENT	x	y
		0	Polygon	0	1394.21	649200	95	312056	4.5036e+06
		1	Polygon	0	2268.9	548357	90	312057	4.5036e+06
		2	Polygon	0	6834.99	209520	50	312057	4.5036e+06
	After	FID	Shape	Id	ISOPLETH	ÁREA (m2)	PERCENT	x	y
		0	Polygon	0	3063.33	673350	95	312071	4.50358e+06
		1	Polygon	0	5256.44	562555	90	312071	4.50358e+06
		2	Polygon	0	16402.7	213038	50	312071	4.50358e+06
	4592
	Before	FID	Shape	Id	ISOPLETH	ÁREA (m2)	PERCENT	x	y
		0	Polygon	0	973.124	652149	95	312119	4.50354e+06
		1	Polygon	0	1615.76	553250	90	312112	4.50354e+06
		2	Polygon	0	4834.83	210860	50	312112	4.50354e+06
	After	FID	Shape	Id	ISOPLETH	ÁREA (m2)	PERCENT	x	y
		0	Polygon	0	2489.55	502146	95	312266	4.5035e+06
		1	Polygon	0	1521.45	440908	90	312354	4.50344e+06
		2	Polygon	0	6888.59	200578	50	312377	4.50344e+06
	4593
	Before	FID	Shape	Id	ISOPLETH	ÁREA (m2)	PERCENT	x	y
		0	Polygon	0	1042.46	597427	95	311491	4.50355e+06
		1	Polygon	0	1630.22	513498	90	311491	4.50354e+06
		2	Polygon	0	4420.89	202860	50	311491	4.50353e+06
	After	FID	Shape	Id	ISOPLETH	ÁREA (m2)	PERCENT	x	y
		0	Polygon	0	1228.49	459117	95	311563	4.50353e+06
		1	Polygon	0	1824.23	397241	90	311549	4.50353e+06
		2	Polygon	0	4791.57	162869	50	311490	4.50353e+06
	4594
	Before	FID	Shape	Id	ISOPLETH	ÁREA (m2)	PERCENT	x	y
		0	Polygon	0	1256	584700	95	312187	4.50354e+06
		1	Polygon	0	2119.31	496283	90	312172	4.50354e+06
		2	Polygon	0	5916.5	198235	50	312150	4.50354e+06
	After	FID	Shape	Id	ISOPLETH	ÁREA (m2)	PERCENT	x	y
		0	Polygon	0	4313.56	840308	95	312119	4.50356e+06
		1	Polygon	0	9363.3	658400	90	312141	4.50355e+06
		2	Polygon	0	38186.2	232848	50	312147	4.50355e+06
	4595
	Before	FID	Shape	Id	ISOPLETH	ÁREA (m2)	PERCENT	x	y
		0	Polygon	0	356.651	458950	95	311915	4.50351e+06
		1	Polygon	0	587.358	389356	90	311898	4.50351e+06
		2	Polygon	0	1687.04	155541	50	311831	4.50351e+06
	After	FID	Shape	Id	ISOPLETH	ÁREA (m2)	PERCENT	x	y
		0	Polygon	0	2300.98	649915	95	311805	4.50351e+06
		1	Polygon	0	3712.24	550096	90	311805	4.50351e+06
		2	Polygon	0	11156.1	209472	50	311805	4.50351e+06
	4596
	Before	FID	Shape	Id	ISOPLETH	ÁREA (m2)	PERCENT	x	y
		0	Polygon	0	159.845	356477	95	311976	4.50356e+06
		1	Polygon	0	297.895	310986	90	311895	4.5035e+06
		2	Polygon	0	936.075	136729	50	311821	4.5035e+06
	After	FID	Shape	Id	ISOPLETH	ÁREA (m2)	PERCENT	x	y
		0	Polygon	0	1269.39	100113	95	312006	4.50328e+06
		1	Polygon	0	2010.22	86909.6	90	311982	4.5033e+06
		2	Polygon	0	5577.86	40290.1	50	311873	4.50341e+06
	4597	Para este emisor no se tienen datos
	Before
	After
	4598
	Before	FID	Shape	Id	ISOPLETH	ÁREA (m2)	PERCENT	x	y
		0	Polygon	0	435.034	1.01102e+06	95	311325	4.50384e+06
		1	Polygon	0	723.841	828551	90	311316	4.50386e+06
		2	Polygon	0	2716.69	280551	50	311295	4.50392e+06
	After	FID	Shape	Id	ISOPLETH	ÁREA (m2)	PERCENT	x	y
		0	Polygon	0	171.68	118230	95	311886	4.50382e+06
		1	Polygon	0	219.584	98689.2	90	311851	4.50377e+06
		2	Polygon	0	435.803	59310.2	50	311516	4.5038e+06

## Sheet: MCP
	Minimum Convex Poligon per transmitter
	OBJECTID	Id	AREA	PERIM	X	Y	Shape_Leng	Shape_Area	Transmitter
	1	0	8.99597e+06	18696.9	314051	4.50496e+06	18696.9	8.99597e+06	4590
	2	0	1.5719e+06	5350.23	311432	4.50394e+06	5350.23	1.5719e+06	4591
	3	0	2.24821e+06	6874.47	312021	4.50363e+06	6874.47	2.24821e+06	4592
	4	0	664732	3874.79	311595	4.50356e+06	3874.79	664732	4593
	5	0	2.32198e+07	21972.1	314923	4.50441e+06	21972.1	2.32198e+07	4594
	6	0	6.76591e+06	18425.1	313731	4.50504e+06	18425.1	6.76591e+06	4595
	7	0	2.06351e+07	21466.3	315190	4.50429e+06	21466.3	2.06351e+07	4596
	8	0	1.84015e+08	64509.5	308715	4.51364e+06	64509.5	1.84015e+08	4597
	9	0	2.55604e+06	9267.99	310811	4.50387e+06	9267.99	2.55604e+06	4598
	10	0	1.26162e+06	5537.68	318935	4.50914e+06	5537.68	1.26162e+06	4589

## Sheet: MCP4589
	Mínimo Polígono Convexo (MPC) del emisor 4589 por día
	Id	FECHA	AREA	PERIM	x	y
	0	8.7.2015	6041.38	325.901	318209	4.50846e+06
	0	9.7.2015	179632	1718.76	318186	4.50874e+06
	0	10.7.2015	385437	3413.03	318897	4.5092e+06
	0	11.7.2015	59178.4	1132.82	319248	4.50944e+06
	0	12.7.2015	1820.73	195.547	319250	4.50937e+06
	0	13.7.2015	1137.92	132.506	319250	4.50937e+06
	0	14.7.2015	2820.53	229.584	319284	4.50937e+06
	0	15.7.2015	925.669	130.232	319266	4.50937e+06
	0	16.7.2015	1389.88	165.743	319264	4.50937e+06
	0	17.7.2015	4229.63	266.827	319246	4.50934e+06
	0	18.7.2015	2607.71	195.783	319258	4.50937e+06
	0	19.7.2015	13583.9	597.332	319331	4.50935e+06
	0	20.7.2015	7369.94	362.287	319278	4.50937e+06
	0	21.7.2015	9623.21	424.232	319268	4.50944e+06
	0	22.7.2015	122020	2150.96	319718	4.50942e+06
	0	23.7.2015	93.8839	67.8748	320196	4.50962e+06

## Sheet: MCP4590
	Mínimo Polígono Convexo (MPC) del emisor 4590 por día
	Id	FECHA	AREA	PERIM	x	y
	0	11.7.2015	45218.7	1819.36	312045	4.50352e+06
	0	9.7.2015	1559.13	169.264	312049	4.50359e+06
	0	10.7.2015	28851.3	752.115	312008	4.50367e+06
	0	12.7.2015	14897	760.103	312092	4.50364e+06
	0	13.7.2015	57873.3	1018.85	311925	4.50374e+06
	0	14.7.2015	52729.6	1105.64	312137	4.5036e+06
	0	15.7.2015	31241	812.766	312013	4.50368e+06
	0	16.7.2015	29830	809.782	312073	4.50353e+06
	0	17.7.2015	218807	1861.41	312056	4.50341e+06
	0	18.7.2015	7582.04	369.595	312087	4.50359e+06
	0	19.7.2015	10548	439.565	312103	4.50363e+06
	0	20.7.2015	136861	1820.55	311860	4.50373e+06
	0	22.7.2015	57585.5	944.513	312110	4.50371e+06
	0	23.7.2015	138727	3137.59	312468	4.50343e+06
	0	21.7.2015	19775.2	547.483	312036	4.50361e+06
	0	24.7.2015	44006.5	1542.23	311878	4.50382e+06
	0	25.7.2015	11279.2	480.177	312100	4.50357e+06
	0	26.7.2015	11586.7	542.137	312014	4.50356e+06
	0	27.7.2015	118780	1373.66	312016	4.50372e+06
	0	28.7.2015	95602.3	1372.49	311950	4.50375e+06
	0	29.7.2015	37351.1	791.84	312008	4.50366e+06
	0	30.7.2015	1563.03	153.914	312063	4.50359e+06
	0	31.7.2015	1583.88	156.181	312067	4.5036e+06
	0	1.8.2015	910.161	121.065	312064	4.5036e+06
	0	2.8.2015	180468	2112.6	312087	4.5035e+06
	0	3.8.2015	3391.03	233.077	312045	4.50362e+06
	0	4.8.2015	193051	1846.33	311879	4.50369e+06
	0	5.8.2015	34546.3	1253.7	312158	4.50355e+06
	0	6.8.2015	64877.9	1191.77	312027	4.50364e+06
	0	7.8.2015	103149	1615.53	312122	4.50355e+06
	0	8.8.2015	43868.4	968.812	312005	4.50348e+06
	0	9.8.2015	118626	1418.4	312040	4.50357e+06
	0	10.8.2015	63545.9	1276.37	311943	4.50365e+06
	0	11.8.2015	69834.4	1057.87	311923	4.50366e+06
	0	12.8.2015	95913	1874.8	312134	4.50345e+06
	0	13.8.2015	115052	1480.06	311916	4.5037e+06
	0	14.8.2015	152759	2081.85	312114	4.50358e+06
	0	15.8.2015	2959.1	204.44	312080	4.50359e+06
	0	16.8.2015	200226	2525.73	311636	4.50362e+06
	0	17.8.2015	8081.56	468.092	312132	4.50357e+06
	0	18.8.2015	2769.08	202.891	312071	4.50358e+06
	0	19.8.2015	26440.8	1187.73	312130	4.50355e+06
	0	20.8.2015	69033.2	1807.6	311934	4.50361e+06
	0	21.8.2015	8504.61	554.695	312041	4.50363e+06
	0	22.8.2015	277628	3000.17	312080	4.50349e+06
	0	23.8.2015	12487.3	438.385	312032	4.50358e+06
	0	24.8.2015	118754	1574.83	311913	4.50356e+06
	0	25.8.2015	180979	1837.35	311942	4.50354e+06
	0	26.8.2015	116305	1477.5	311916	4.50362e+06
	0	27.8.2015	38521.2	1028.57	311945	4.50359e+06

## Sheet: MCP4591
	Mínimo Polígono Convexo (MPC) del emisor 4591 por día
	Id	FECHA	AREA	PERIM	x	y
	0	9.7.2015	4600.7	304.806	311936	4.50358e+06
	0	10.7.2015	21313.3	750.938	311730	4.50366e+06
	0	11.7.2015	597236	4043.94	311122	4.50389e+06
	0	12.7.2015	35985.6	1226.72	311626	4.50376e+06
	0	13.7.2015	34952.3	769.913	311580	4.50377e+06
	0	14.7.2015	62353.7	1248.89	311691	4.50378e+06
	0	15.7.2015	180454	1814.9	311492	4.50367e+06
	0	16.7.2015	26809.7	874.296	311562	4.50382e+06
	0	17.7.2015	13738.2	625.331	311592	4.50371e+06
	0	18.7.2015	11993.3	435.068	311672	4.50375e+06
	0	19.7.2015	14227.2	611.318	311538	4.5038e+06
	0	20.7.2015	226307	1888.42	311751	4.50369e+06
	0	21.7.2015	68178.1	1219.31	311699	4.50386e+06
	0	22.7.2015	57108.7	976.912	311705	4.50381e+06
	0	23.7.2015	50097.2	1086.73	311781	4.50364e+06
	0	24.7.2015	20430.8	612.882	311625	4.50378e+06
	0	25.7.2015	4001.55	266.667	311600	4.50375e+06
	0	26.7.2015	4316.79	261.462	311614	4.50374e+06
	0	27.7.2015	78423	1154.29	311566	4.50382e+06
	0	28.7.2015	19275.1	647.69	311552	4.50381e+06
	0	29.7.2015	54375.3	1443.34	311848	4.50368e+06
	0	30.7.2015	3152.62	239.177	311618	4.50374e+06
	0	31.7.2015	2172.27	177.535	311618	4.50374e+06
	0	1.8.2015	2751.95	256.054	311610	4.50375e+06
	0	2.8.2015	5581.22	300.946	311614	4.50375e+06
	0	3.8.2015	373109	2667.25	311964	4.50382e+06
	0	4.8.2015	52368.2	989.612	311623	4.50382e+06
	0	5.8.2015	155832	1729.88	311592	4.50384e+06
	0	6.8.2015	59148	997.034	311701	4.50377e+06
	0	7.8.2015	14068.3	615.632	311623	4.50368e+06
	0	8.8.2015	2789.73	212.844	311617	4.50374e+06
	0	9.8.2015	3609.11	259.119	311615	4.50375e+06
	0	10.8.2015	56872.2	1409.88	311618	4.50366e+06
	0	11.8.2015	6373	310.696	311606	4.50375e+06
	0	12.8.2015	27158.9	791.78	311566	4.50375e+06
	0	13.8.2015	55160	1108	311688	4.50369e+06
	0	14.8.2015	22633.6	938.266	311649	4.50368e+06
	0	15.8.2015	4014.12	240.773	311610	4.50374e+06
	0	16.8.2015	4073	262.542	311609	4.50375e+06
	0	17.8.2015	6753.58	338.371	311611	4.50375e+06
	0	18.8.2015	5435.79	339.528	311604	4.50376e+06
	0	19.8.2015	37210.3	909.425	311712	4.50369e+06
	0	20.8.2015	31107	867.429	311609	4.50379e+06
	0	21.8.2015	15475.1	481.751	311610	4.50375e+06
	0	22.8.2015	13561.3	498.725	311577	4.50376e+06
	0	23.8.2015	11576.7	500.315	311604	4.50371e+06
	0	24.8.2015	73007.8	1270.82	311497	4.50379e+06
	0	25.8.2015	19305.6	730.597	311550	4.5038e+06
	0	26.8.2015	23790.4	855.171	311585	4.50381e+06
	0	27.8.2015	61123.6	1467.14	311504	4.50385e+06
	0	28.8.2015	1720.78	169.553	311604	4.50374e+06
	0	29.8.2015	2951.72	237.057	311629	4.50374e+06
	0	30.8.2015	14387.5	493.259	311686	4.50374e+06
	0	31.8.2015	1665.58	173.481	311724	4.50376e+06
	0	1.9.2015	977.26	152.386	311728	4.50376e+06
	0	2.9.2015	1925.36	203.992	311739	4.50377e+06
	0	3.9.2015	3480.25	336.965	311748	4.50377e+06
	0	4.9.2015	3574.72	294.232	311686	4.50375e+06
	0	5.9.2015	5549.9	407.69	311712	4.50373e+06

## Sheet: MCP4592
	Mínimo Polígono Convexo (MPC) del emisor 4592 por día
	Id	FECHA	AREA	PERIM	x	y
	0	10.7.2015	18822.5	611.023	312093	4.50356e+06
	0	11.7.2015	11816.4	457.497	312130	4.50359e+06
	0	12.7.2015	141165	2420.78	312235	4.5033e+06
	0	13.7.2015	74530.4	1750.05	312121	4.50351e+06
	0	14.7.2015	195196	1971.01	312313	4.50356e+06
	0	15.7.2015	97304.1	1568.61	312044	4.50355e+06
	0	16.7.2015	37783.2	828.764	312179	4.50352e+06
	0	17.7.2015	30755	792.375	312101	4.5036e+06
	0	18.7.2015	29094.8	1114.26	312046	4.50358e+06
	0	19.7.2015	202200	2531.56	312360	4.50375e+06
	0	20.7.2015	195836	2727.06	312268	4.50331e+06
	0	21.7.2015	5960.27	299.285	312118	4.50357e+06
	0	22.7.2015	54989.1	1366.36	312339	4.50355e+06
	0	23.7.2015	362721	4387.56	311689	4.5037e+06
	0	24.7.2015	9695.64	570.77	312292	4.50338e+06
	0	25.7.2015	9524	430.147	312334	4.50345e+06
	0	26.7.2015	166935	1924.48	312125	4.50341e+06
	0	27.7.2015	84103.6	1456.84	312439	4.50324e+06
	0	28.7.2015	14297.4	495.847	312338	4.50353e+06
	0	29.7.2015	106404	1392.29	312304	4.50357e+06
	0	30.7.2015	1434.49	161.677	312332	4.50347e+06
	0	31.7.2015	13324.7	513.639	312413	4.50349e+06
	0	1.8.2015	101164	1499.37	312304	4.50342e+06
	0	2.8.2015	45834.3	878.487	312357	4.50348e+06
	0	3.8.2015	68614.7	1024.23	312358	4.50345e+06
	0	4.8.2015	146337	1672.38	312219	4.50336e+06
	0	5.8.2015	25151.9	620.855	312447	4.50344e+06
	0	6.8.2015	15134.4	475.812	312400	4.50343e+06
	0	7.8.2015	4524.76	270.602	312424	4.50342e+06
	0	8.8.2015	1304.2	144.009	312439	4.50341e+06
	0	9.8.2015	5597.53	287.395	312450	4.5034e+06
	0	10.8.2015	2987.52	234.401	312435	4.50342e+06
	0	11.8.2015	2938.13	271.084	312405	4.50342e+06
	0	12.8.2015	4650.52	297.301	312396	4.50342e+06
	0	13.8.2015	4810.45	314.959	312434	4.50341e+06
	0	14.8.2015	4248.4	297.531	312415	4.50341e+06
	0	15.8.2015	4022.32	314.345	312419	4.50341e+06
	0	16.8.2015	4059.37	341.287	312406	4.50342e+06
	0	17.8.2015	3661.11	266.043	312413	4.50342e+06
	0	18.8.2015	3404.11	251.3	312419	4.50342e+06
	0	19.8.2015	3024.45	248.83	312419	4.50342e+06
	0	20.8.2015	6788.36	325.432	312412	4.50341e+06
	0	21.8.2015	5751.94	300.313	312405	4.5034e+06
	0	22.8.2015	4460.06	272.851	312410	4.50339e+06
	0	23.8.2015	4398.05	281.554	312423	4.50342e+06
	0	24.8.2015	3727.19	268.432	312420	4.50341e+06
	0	25.8.2015	40348.9	1547.73	312176	4.50337e+06
	0	26.8.2015	4546.44	305.599	312405	4.50341e+06
	0	27.8.2015	4284.29	314.415	312411	4.50341e+06
	0	28.8.2015	1338.51	211.509	312411	4.50341e+06
	0	29.8.2015	1876.19	256.828	312413	4.50342e+06
	0	30.8.2015	1911.49	198.609	312421	4.50341e+06
	0	31.8.2015	2894.84	222.736	312428	4.50341e+06
	0	1.9.2015	1266.29	156.276	312425	4.5034e+06
	0	2.9.2015	2631.22	222.453	312421	4.5034e+06
	0	3.9.2015	1842.61	250.514	312402	4.50342e+06
	0	4.9.2015	3603.73	281.734	312407	4.50341e+06
	0	5.9.2015	1155.02	146.179	312434	4.50341e+06

## Sheet: MCP4593
	Mínimo Polígono Convexo (MPC) del emisor 4593 por día
	Id	FECHA	AREA	PERIM	x	y
	0	10.7.2015	62473.4	1197.15	311716	4.50353e+06
	0	11.7.2015	68261.7	1802.46	311291	4.50378e+06
	0	12.7.2015	35965.8	805.206	311420	4.50352e+06
	0	13.7.2015	47045.2	936.467	311500	4.50362e+06
	0	14.7.2015	35469.3	996.564	311590	4.50336e+06
	0	15.7.2015	41259.9	1067.46	311435	4.50363e+06
	0	16.7.2015	7743.36	367.782	311510	4.50353e+06
	0	17.7.2015	41188.6	831.479	311374	4.5035e+06
	0	18.7.2015	1213.22	138.508	311487	4.50354e+06
	0	19.7.2015	1853.56	176.71	311474	4.50355e+06
	0	20.7.2015	2583.99	196.162	311500	4.50352e+06
	0	21.7.2015	1624.98	164.103	311489	4.50353e+06
	0	22.7.2015	3749.77	318.25	311503	4.50352e+06
	0	23.7.2015	1802.62	168.665	311484	4.50352e+06
	0	24.7.2015	2178.97	192.514	311481	4.50353e+06
	0	25.7.2015	3658.34	232.548	311489	4.50352e+06
	0	26.7.2015	2548.46	201.172	311478	4.50353e+06
	0	27.7.2015	3450.22	226.866	311486	4.50352e+06
	0	28.7.2015	5227.57	383.091	311483	4.50355e+06
	0	29.7.2015	1690.79	155.66	311487	4.50353e+06
	0	30.7.2015	946.045	124.004	311484	4.50354e+06
	0	31.7.2015	710.645	100.509	311489	4.50354e+06
	0	1.8.2015	901.807	113.625	311491	4.50353e+06
	0	2.8.2015	1203.46	142.231	311495	4.50354e+06
	0	3.8.2015	409.388	84.5533	311484	4.50354e+06
	0	4.8.2015	4591.47	485.446	311495	4.50353e+06
	0	5.8.2015	1125.93	143.202	311494	4.50353e+06
	0	6.8.2015	2591.82	220.428	311489	4.50352e+06
	0	7.8.2015	792.938	114.762	311490	4.50354e+06
	0	8.8.2015	1202.88	148.864	311489	4.50353e+06
	0	9.8.2015	2192.24	190.076	311486	4.50353e+06
	0	10.8.2015	2449.52	186.724	311480	4.50353e+06
	0	11.8.2015	1230.7	140.644	311485	4.50354e+06
	0	12.8.2015	1749.11	167.918	311481	4.50353e+06
	0	13.8.2015	1270.79	138.345	311483	4.50353e+06
	0	14.8.2015	1408.43	167.12	311477	4.50353e+06
	0	15.8.2015	1049.47	142.509	311482	4.50353e+06
	0	16.8.2015	1761.24	190.036	311480	4.50353e+06
	0	17.8.2015	1348.89	156.662	311487	4.50353e+06
	0	19.8.2015	940.612	136.63	311463	4.50353e+06
	0	20.8.2015	1274.08	135.092	311482	4.50353e+06
	0	21.8.2015	1671.11	157.429	311479	4.50353e+06
	0	22.8.2015	1617.8	154.196	311483	4.50353e+06
	0	23.8.2015	2808.11	219.892	311486	4.50353e+06
	0	24.8.2015	2329.45	187.772	311490	4.50353e+06
	0	25.8.2015	12507.5	665.074	311530	4.5036e+06
	0	26.8.2015	2491.77	197.78	311495	4.50352e+06
	0	27.8.2015	83987.9	1206.36	311552	4.50376e+06
	0	28.8.2015	3113.45	244.435	311502	4.50352e+06
	0	29.8.2015	2693.96	208.668	311497	4.50352e+06
	0	30.8.2015	1901.3	175.358	311489	4.50352e+06
	0	31.8.2015	2197.56	188.736	311490	4.50351e+06
	0	1.9.2015	3934.46	250.727	311504	4.50351e+06
	0	2.9.2015	1881.08	184.143	311501	4.50351e+06
	0	3.9.2015	2458.37	220.384	311510	4.50352e+06
	0	4.9.2015	1671.27	158.188	311504	4.50353e+06
	0	5.9.2015	176799	2838.76	311753	4.50349e+06

[truncated: 5 more sheets: MCP4594, MCP4595, MCP4596, MCP4597, MCP4598]
